# Supplementary material for: Phylogenetic analyses of distantly related clades of bent-toed geckos (genus Cyrtodactylus) reveal an unprecedented amount of cryptic diversity in northern and western Thailand
Source: PubMed Central journal article supplement (PMC7840752; doi:10.1038/s41598-020-70640-8), 2021-01-27
Supplement: 41598_2020_70640_MOESM1_ESM.pdf [file 41598_2020_70640_MOESM1_ESM.pdf]

Supplementary information  
Table S1

**Phylogenetic analyses of distantly related clades of bent-toed geckos (genus *Cyrtodactylus*) reveal an unprecedented amount of cryptic diversity in northern and western Thailand**

Siriwadee Chomdej<sup>1,2\*</sup>, Waranee Pradit<sup>1</sup>, Chatmongkon Suwannapoom<sup>3</sup>, Parinya Pawangkhanant<sup>3</sup>, Korakot Nganvongpanit<sup>4,5</sup>, Nikolay A. Poyarkov<sup>6,7</sup>, Jing Che<sup>8,9</sup>, Yangchun Gao<sup>10</sup>, Shiping Gong<sup>10\*</sup>

**Table S1** Interspecific uncorrected p-distance (percentage) based on the sequences of *ND2* gene (below the diagonal line) and intraspecific p-distance (on the diagonal line) of *Cyrtodactylus* species in phylogenetic analysis.

|    | Species                                   | outgroup | 1    | 2    | 3    | 4    | 5    | 6    | 7    | 8    | 9    | 10   | 11   | 12   | 13   | 14   | 15   | 16   | 17   | 18   | 19   | 20   |
|----|-------------------------------------------|----------|------|------|------|------|------|------|------|------|------|------|------|------|------|------|------|------|------|------|------|------|
|    | outgroups                                 | 0.56     |      |      |      |      |      |      |      |      |      |      |      |      |      |      |      |      |      |      |      |      |
| 1  | <i>Cyrtodactylus inthanon</i>             | 0.52     | 0.00 |      |      |      |      |      |      |      |      |      |      |      |      |      |      |      |      |      |      |      |
| 2  | <i>Cyrtodactylus</i> sp5                  | 0.58     | 0.23 | 0.00 |      |      |      |      |      |      |      |      |      |      |      |      |      |      |      |      |      |      |
| 3  | <i>Cyrtodactylus sanook</i>               | 0.53     | 0.24 | 0.24 | 0.00 |      |      |      |      |      |      |      |      |      |      |      |      |      |      |      |      |      |
| 4  | <i>Cyrtodactylus brevipalmatus</i>        | 0.54     | 0.31 | 0.31 | 0.31 | -    |      |      |      |      |      |      |      |      |      |      |      |      |      |      |      |      |
| 5  | <i>Cyrtodactylus saiyok</i> (Suan Phueng) | 0.54     | 0.24 | 0.24 | 0.18 | 0.31 | -    |      |      |      |      |      |      |      |      |      |      |      |      |      |      |      |
| 6  | <i>Cyrtodactylus saiyok</i>               | 0.55     | 0.24 | 0.25 | 0.18 | 0.31 | 0.05 | 0.00 |      |      |      |      |      |      |      |      |      |      |      |      |      |      |
| 7  | <i>Cyrtodactylus</i> sp. 2                | 0.53     | 0.05 | 0.21 | 0.25 | 0.31 | 0.24 | 0.25 | 0.00 |      |      |      |      |      |      |      |      |      |      |      |      |      |
| 8  | <i>Cyrtodactylus</i> sp. 10               | 0.53     | 0.31 | 0.32 | 0.30 | 0.19 | 0.29 | 0.30 | 0.30 | -    |      |      |      |      |      |      |      |      |      |      |      |      |
| 9  | <i>Cyrtodactylus</i> sp. 1                | 0.52     | 0.05 | 0.22 | 0.25 | 0.31 | 0.25 | 0.24 | 0.05 | 0.30 | 0.02 |      |      |      |      |      |      |      |      |      |      |      |
| 10 | <i>Cyrtodactylus</i> sp. 3                | 0.52     | 0.13 | 0.25 | 0.27 | 0.31 | 0.29 | 0.28 | 0.13 | 0.31 | 0.13 | 0.00 |      |      |      |      |      |      |      |      |      |      |
| 11 | <i>Cyrtodactylus</i> sp. 6                | 0.52     | 0.21 | 0.14 | 0.25 | 0.29 | 0.22 | 0.23 | 0.21 | 0.29 | 0.22 | 0.20 | -    |      |      |      |      |      |      |      |      |      |
| 12 | <i>Cyrtodactylus</i> sp. 9                | 0.53     | 0.31 | 0.33 | 0.32 | 0.21 | 0.30 | 0.31 | 0.30 | 0.07 | 0.31 | 0.32 | 0.30 | 0.00 |      |      |      |      |      |      |      |      |
| 13 | <i>Cyrtodactylus</i> sp. 7                | 0.52     | 0.23 | 0.23 | 0.10 | 0.30 | 0.16 | 0.17 | 0.22 | 0.28 | 0.23 | 0.25 | 0.22 | 0.30 | 0.00 |      |      |      |      |      |      |      |
| 14 | <i>Cyrtodactylus</i> sp. 8                | 0.50     | 0.22 | 0.22 | 0.13 | 0.30 | 0.16 | 0.17 | 0.21 | 0.29 | 0.22 | 0.23 | 0.20 | 0.30 | 0.12 | 0.01 |      |      |      |      |      |      |
| 15 | <i>Cyrtodactylus doisuthep</i>            | 0.53     | 0.20 | 0.01 | 0.23 | 0.30 | 0.23 | 0.23 | 0.20 | 0.30 | 0.21 | 0.23 | 0.13 | 0.31 | 0.21 | 0.20 | -    |      |      |      |      |      |
| 16 | <i>Cyrtodactylus dumnuui</i>              | 0.50     | 0.20 | 0.18 | 0.23 | 0.30 | 0.22 | 0.23 | 0.18 | 0.31 | 0.20 | 0.21 | 0.17 | 0.32 | 0.20 | 0.21 | 0.16 | 0.00 |      |      |      |      |
| 17 | <i>Cyrtodactylus tigroides</i>            | 0.52     | 0.23 | 0.24 | 0.25 | 0.32 | 0.25 | 0.26 | 0.23 | 0.30 | 0.23 | 0.23 | 0.21 | 0.31 | 0.24 | 0.23 | 0.22 | 0.21 | 0.08 |      |      |      |
| 18 | <i>Cyrtodactylus erythropros</i>          | 0.51     | 0.21 | 0.14 | 0.25 | 0.29 | 0.22 | 0.23 | 0.20 | 0.30 | 0.21 | 0.21 | 0.07 | 0.31 | 0.22 | 0.20 | 0.12 | 0.16 | 0.21 | -    |      |      |
| 19 | <i>Cyrtodactylus</i> sp. 4                | 0.52     | 0.17 | 0.22 | 0.26 | 0.32 | 0.25 | 0.24 | 0.17 | 0.31 | 0.18 | 0.18 | 0.21 | 0.31 | 0.23 | 0.23 | 0.20 | 0.21 | 0.23 | 0.20 | -    |      |
| 20 | <i>Cyrtodactylus welpyanensis</i>         | 0.53     | 0.09 | 0.23 | 0.25 | 0.31 | 0.26 | 0.27 | 0.07 | 0.30 | 0.08 | 0.13 | 0.22 | 0.30 | 0.24 | 0.22 | 0.21 | 0.18 | 0.22 | 0.21 | 0.17 | 0.00 |
| 21 | <i>Cyrtodactylus sineyineensis</i>        | 0.54     | 0.12 | 0.24 | 0.26 | 0.33 | 0.27 | 0.28 | 0.11 | 0.30 | 0.12 | 0.15 | 0.22 | 0.32 | 0.23 | 0.23 | 0.22 | 0.20 | 0.25 | 0.23 | 0.19 | 0.10 |
| 22 | <i>Cyrtodactylus dammathetensis</i>       | 0.51     | 0.14 | 0.24 | 0.28 | 0.31 | 0.28 | 0.29 | 0.13 | 0.30 | 0.13 | 0.12 | 0.20 | 0.30 | 0.26 | 0.24 | 0.22 | 0.21 | 0.22 | 0.20 | 0.17 | 0.13 |
| 23 | <i>Cyrtodactylus aequalis</i>             | 0.54     | 0.13 | 0.24 | 0.27 | 0.32 | 0.28 | 0.28 | 0.13 | 0.31 | 0.13 | 0.06 | 0.20 | 0.32 | 0.25 | 0.23 | 0.22 | 0.19 | 0.24 | 0.19 | 0.17 | 0.12 |
| 24 | <i>Cyrtodactylus auribalteatus</i>        | 0.50     | 0.20 | 0.16 | 0.22 | 0.29 | 0.23 | 0.23 | 0.21 | 0.29 | 0.21 | 0.22 | 0.16 | 0.29 | 0.19 | 0.20 | 0.15 | 0.14 | 0.21 | 0.16 | 0.20 | 0.19 |

**Table S1 (Continued)** Interspecific uncorrected p-distance (percentage) based on the sequences of *ND2* gene (below the diagonal line) and intraspecific p-distance (on the diagonal line) of *Cyrtodactylus* species in phylogenetic analysis.

|    | Species                                   | 21   | 22   | 23   | 24 | 25 | 26 | 27 | 28 | 29 | 30 | 31 | 32 | 33 | 34 | 35 | 36 | 37 | 38 | 39 | 40 | 41 |
|----|-------------------------------------------|------|------|------|----|----|----|----|----|----|----|----|----|----|----|----|----|----|----|----|----|----|
|    | outgroups                                 |      |      |      |    |    |    |    |    |    |    |    |    |    |    |    |    |    |    |    |    |    |
| 1  | <i>Cyrtodactylus inthanon</i>             |      |      |      |    |    |    |    |    |    |    |    |    |    |    |    |    |    |    |    |    |    |
| 2  | <i>Cyrtodactylus</i> sp. 5                |      |      |      |    |    |    |    |    |    |    |    |    |    |    |    |    |    |    |    |    |    |
| 3  | <i>Cyrtodactylus sanook</i>               |      |      |      |    |    |    |    |    |    |    |    |    |    |    |    |    |    |    |    |    |    |
| 4  | <i>Cyrtodactylus brevipalmatus</i>        |      |      |      |    |    |    |    |    |    |    |    |    |    |    |    |    |    |    |    |    |    |
| 5  | <i>Cyrtodactylus saiyok</i> (Suan Phueng) |      |      |      |    |    |    |    |    |    |    |    |    |    |    |    |    |    |    |    |    |    |
| 6  | <i>Cyrtodactylus saiyok</i>               |      |      |      |    |    |    |    |    |    |    |    |    |    |    |    |    |    |    |    |    |    |
| 7  | <i>Cyrtodactylus</i> sp. 2                |      |      |      |    |    |    |    |    |    |    |    |    |    |    |    |    |    |    |    |    |    |
| 8  | <i>Cyrtodactylus</i> sp. 10               |      |      |      |    |    |    |    |    |    |    |    |    |    |    |    |    |    |    |    |    |    |
| 9  | <i>Cyrtodactylus</i> sp. 1                |      |      |      |    |    |    |    |    |    |    |    |    |    |    |    |    |    |    |    |    |    |
| 10 | <i>Cyrtodactylus</i> sp. 3                |      |      |      |    |    |    |    |    |    |    |    |    |    |    |    |    |    |    |    |    |    |
| 11 | <i>Cyrtodactylus</i> sp. 6                |      |      |      |    |    |    |    |    |    |    |    |    |    |    |    |    |    |    |    |    |    |
| 12 | <i>Cyrtodactylus</i> sp. 9                |      |      |      |    |    |    |    |    |    |    |    |    |    |    |    |    |    |    |    |    |    |
| 13 | <i>Cyrtodactylus</i> sp. 7                |      |      |      |    |    |    |    |    |    |    |    |    |    |    |    |    |    |    |    |    |    |
| 14 | <i>Cyrtodactylus</i> sp. 8                |      |      |      |    |    |    |    |    |    |    |    |    |    |    |    |    |    |    |    |    |    |
| 15 | <i>Cyrtodactylus doisuthep</i>            |      |      |      |    |    |    |    |    |    |    |    |    |    |    |    |    |    |    |    |    |    |
| 16 | <i>Cyrtodactylus dumnuii</i>              |      |      |      |    |    |    |    |    |    |    |    |    |    |    |    |    |    |    |    |    |    |
| 17 | <i>Cyrtodactylus tigroides</i>            |      |      |      |    |    |    |    |    |    |    |    |    |    |    |    |    |    |    |    |    |    |
| 18 | <i>Cyrtodactylus erythropros</i>          |      |      |      |    |    |    |    |    |    |    |    |    |    |    |    |    |    |    |    |    |    |
| 19 | <i>Cyrtodactylus</i> sp. 4                |      |      |      |    |    |    |    |    |    |    |    |    |    |    |    |    |    |    |    |    |    |
| 20 | <i>Cyrtodactylus welpyanensis</i>         |      |      |      |    |    |    |    |    |    |    |    |    |    |    |    |    |    |    |    |    |    |
| 21 | <i>Cyrtodactylus sineyineensis</i>        | 0.00 |      |      |    |    |    |    |    |    |    |    |    |    |    |    |    |    |    |    |    |    |
| 22 | <i>Cyrtodactylus dammathetensis</i>       | 0.16 | 0.00 |      |    |    |    |    |    |    |    |    |    |    |    |    |    |    |    |    |    |    |
| 23 | <i>Cyrtodactylus aequalis</i>             | 0.15 | 0.11 | 0.00 |    |    |    |    |    |    |    |    |    |    |    |    |    |    |    |    |    |    |
| 24 | <i>Cyrtodactylus aurtibalteatus</i>       | 0.22 | 0.21 | 0.21 | -  |    |    |    |    |    |    |    |    |    |    |    |    |    |    |    |    |    |

**Table S1 (Continued)** Interspecific uncorrected p-distance (percentage) based on the sequences of *ND2* gene (below the diagonal line) and intraspecific p-distance (on the diagonal line) of *Cyrtodactylus* species in phylogenetic analysis.

|    | Species                                   | outgroup | 1    | 2    | 3    | 4    | 5    | 6    | 7    | 8    | 9    | 10   | 11   | 12   | 13   | 14   | 15   | 16   | 17   | 18   | 19   | 20   |
|----|-------------------------------------------|----------|------|------|------|------|------|------|------|------|------|------|------|------|------|------|------|------|------|------|------|------|
| 25 | <i>Cyrtodactylus tigroides</i> (AP018116) | 0.56     | 0.27 | 0.28 | 0.10 | 0.34 | 0.18 | 0.19 | 0.27 | 0.33 | 0.27 | 0.28 | 0.26 | 0.33 | 0.13 | 0.15 | 0.25 | 0.25 | 0.28 | 0.25 | 0.27 | 0.27 |
| 26 | <i>Cyrtodactylus lenya</i>                | 0.53     | 0.25 | 0.25 | 0.20 | 0.31 | 0.20 | 0.19 | 0.25 | 0.30 | 0.25 | 0.28 | 0.22 | 0.30 | 0.20 | 0.18 | 0.23 | 0.23 | 0.25 | 0.22 | 0.25 | 0.24 |
| 27 | <i>Cyrtodactylus oldhami</i> (captive)    | 0.52     | 0.24 | 0.25 | 0.12 | 0.33 | 0.16 | 0.17 | 0.24 | 0.30 | 0.25 | 0.25 | 0.25 | 0.31 | 0.10 | 0.14 | 0.24 | 0.24 | 0.25 | 0.24 | 0.24 | 0.25 |
| 28 | <i>Cyrtodactylus oldhami</i> (Phang-Nga)  | 0.52     | 0.24 | 0.26 | 0.08 | 0.33 | 0.17 | 0.20 | 0.24 | 0.30 | 0.24 | 0.28 | 0.24 | 0.31 | 0.10 | 0.13 | 0.23 | 0.24 | 0.25 | 0.23 | 0.24 | 0.26 |
| 29 | <i>Cyrtodactylus oldhami</i> (Ranong)     | 0.52     | 0.24 | 0.24 | 0.08 | 0.32 | 0.16 | 0.18 | 0.23 | 0.30 | 0.24 | 0.25 | 0.23 | 0.30 | 0.11 | 0.12 | 0.22 | 0.23 | 0.24 | 0.22 | 0.24 | 0.23 |
| 30 | <i>Cyrtodactylus payarhtanensis</i>       | 0.55     | 0.25 | 0.24 | 0.09 | 0.32 | 0.17 | 0.17 | 0.26 | 0.31 | 0.25 | 0.28 | 0.25 | 0.33 | 0.12 | 0.12 | 0.24 | 0.25 | 0.26 | 0.24 | 0.27 | 0.24 |
| 31 | <i>Cyrtodactylus thirakhupti</i>          | 0.52     | 0.22 | 0.24 | 0.08 | 0.31 | 0.17 | 0.19 | 0.22 | 0.28 | 0.23 | 0.26 | 0.22 | 0.31 | 0.10 | 0.13 | 0.21 | 0.22 | 0.23 | 0.21 | 0.23 | 0.24 |
| 32 | <i>Cyrtodactylus linnoensis</i>           | 0.51     | 0.25 | 0.27 | 0.22 | 0.33 | 0.25 | 0.26 | 0.25 | 0.31 | 0.25 | 0.26 | 0.24 | 0.33 | 0.23 | 0.22 | 0.24 | 0.24 | 0.26 | 0.22 | 0.25 | 0.25 |
| 33 | <i>Cyrtodactylus sadanensis</i>           | 0.49     | 0.23 | 0.24 | 0.21 | 0.31 | 0.23 | 0.24 | 0.23 | 0.30 | 0.23 | 0.22 | 0.21 | 0.32 | 0.21 | 0.20 | 0.22 | 0.21 | 0.23 | 0.22 | 0.23 | 0.23 |
| 34 | <i>Cyrtodactylus yathepyanensis</i>       | 0.50     | 0.24 | 0.25 | 0.24 | 0.32 | 0.25 | 0.24 | 0.24 | 0.31 | 0.24 | 0.25 | 0.24 | 0.32 | 0.23 | 0.21 | 0.24 | 0.23 | 0.26 | 0.23 | 0.24 | 0.24 |
| 35 | <i>Cyrtodactylus sadansinensis</i>        | 0.49     | 0.23 | 0.25 | 0.25 | 0.30 | 0.24 | 0.26 | 0.24 | 0.29 | 0.24 | 0.23 | 0.21 | 0.31 | 0.23 | 0.23 | 0.23 | 0.22 | 0.24 | 0.20 | 0.23 | 0.23 |
| 36 | <i>Cyrtodactylus pharbaungensis</i>       | 0.50     | 0.22 | 0.25 | 0.24 | 0.29 | 0.25 | 0.27 | 0.22 | 0.28 | 0.21 | 0.23 | 0.21 | 0.29 | 0.23 | 0.24 | 0.23 | 0.21 | 0.23 | 0.19 | 0.22 | 0.21 |
| 37 | <i>Cyrtodactylus sanpelensis</i>          | 0.49     | 0.22 | 0.23 | 0.23 | 0.28 | 0.23 | 0.25 | 0.23 | 0.29 | 0.23 | 0.23 | 0.21 | 0.29 | 0.22 | 0.22 | 0.22 | 0.21 | 0.23 | 0.19 | 0.22 | 0.22 |
| 38 | <i>Cyrtodactylus linnwayensis</i>         | 0.53     | 0.26 | 0.30 | 0.28 | 0.30 | 0.28 | 0.29 | 0.25 | 0.29 | 0.27 | 0.28 | 0.26 | 0.31 | 0.28 | 0.26 | 0.27 | 0.24 | 0.25 | 0.25 | 0.26 | 0.25 |
| 39 | <i>Cyrtodactylus shwetaungorum</i>        | 0.51     | 0.27 | 0.28 | 0.29 | 0.30 | 0.28 | 0.30 | 0.27 | 0.31 | 0.28 | 0.29 | 0.26 | 0.33 | 0.27 | 0.26 | 0.26 | 0.25 | 0.26 | 0.26 | 0.28 | 0.26 |
| 40 | <i>Cyrtodactylus elok</i>                 | 0.56     | 0.33 | 0.33 | 0.32 | 0.22 | 0.32 | 0.32 | 0.34 | 0.23 | 0.34 | 0.35 | 0.31 | 0.24 | 0.32 | 0.32 | 0.31 | 0.33 | 0.35 | 0.30 | 0.34 | 0.33 |
| 41 | <i>Cyrtodactylus interdigitalis</i>       | 0.53     | 0.33 | 0.33 | 0.33 | 0.22 | 0.32 | 0.32 | 0.32 | 0.09 | 0.32 | 0.34 | 0.31 | 0.08 | 0.32 | 0.32 | 0.31 | 0.32 | 0.33 | 0.31 | 0.32 | 0.31 |

**Table S1** (Continued) Interspecific uncorrected p-distance (percentage) based on the sequences of *ND2* gene (below the diagonal line) and intraspecific p-distance (on the diagonal line) of *Cyrtodactylus* species in phylogenetic analysis.

|    | Species                                   | 21   | 22   | 23   | 24   | 25   | 26   | 27   | 28   | 29   | 30   | 31   | 32   | 33   | 34   | 35   | 36   | 37   | 38   | 39   | 40   | 41   |  |
|----|-------------------------------------------|------|------|------|------|------|------|------|------|------|------|------|------|------|------|------|------|------|------|------|------|------|--|
| 25 | <i>Cyrtodactylus tigroides</i> (AP018116) | 0.28 | 0.30 | 0.28 | 0.24 | -    |      |      |      |      |      |      |      |      |      |      |      |      |      |      |      |      |  |
| 26 | <i>Cyrtodactylus lenya</i>                | 0.27 | 0.27 | 0.27 | 0.23 | 0.22 | 0.00 |      |      |      |      |      |      |      |      |      |      |      |      |      |      |      |  |
| 27 | <i>Cyrtodactylus oldhami</i> (captive)    | 0.26 | 0.27 | 0.25 | 0.22 | 0.14 | 0.21 | -    |      |      |      |      |      |      |      |      |      |      |      |      |      |      |  |
| 28 | <i>Cyrtodactylus oldhami</i> (Phang-Nga)  | 0.26 | 0.28 | 0.28 | 0.21 | 0.11 | 0.20 | 0.12 | -    |      |      |      |      |      |      |      |      |      |      |      |      |      |  |
| 29 | <i>Cyrtodactylus oldhami</i> (Ranong)     | 0.25 | 0.28 | 0.25 | 0.22 | 0.04 | 0.20 | 0.12 | 0.08 | -    |      |      |      |      |      |      |      |      |      |      |      |      |  |
| 30 | <i>Cyrtodactylus payarhtanensis</i>       | 0.27 | 0.30 | 0.29 | 0.23 | 0.11 | 0.20 | 0.13 | 0.10 | 0.08 | 0.00 |      |      |      |      |      |      |      |      |      |      |      |  |
| 31 | <i>Cyrtodactylus thirakhupti</i>          | 0.25 | 0.25 | 0.26 | 0.21 | 0.10 | 0.18 | 0.12 | 0.08 | 0.08 | 0.09 | 0.01 |      |      |      |      |      |      |      |      |      |      |  |
| 32 | <i>Cyrtodactylus linnoensis</i>           | 0.27 | 0.25 | 0.26 | 0.24 | 0.25 | 0.25 | 0.24 | 0.23 | 0.24 | 0.23 | 0.22 | 0.00 |      |      |      |      |      |      |      |      |      |  |
| 33 | <i>Cyrtodactylus sadanensis</i>           | 0.24 | 0.23 | 0.23 | 0.20 | 0.24 | 0.23 | 0.23 | 0.21 | 0.22 | 0.21 | 0.20 | 0.08 | 0.00 |      |      |      |      |      |      |      |      |  |
| 34 | <i>Cyrtodactylus yathepyanensis</i>       | 0.25 | 0.25 | 0.26 | 0.23 | 0.25 | 0.25 | 0.25 | 0.23 | 0.24 | 0.24 | 0.23 | 0.11 | 0.10 | 0.01 |      |      |      |      |      |      |      |  |
| 35 | <i>Cyrtodactylus sadansinensis</i>        | 0.25 | 0.24 | 0.24 | 0.21 | 0.28 | 0.24 | 0.25 | 0.24 | 0.25 | 0.24 | 0.23 | 0.22 | 0.21 | 0.22 | 0.00 |      |      |      |      |      |      |  |
| 36 | <i>Cyrtodactylus pharbaungensis</i>       | 0.24 | 0.23 | 0.23 | 0.21 | 0.27 | 0.22 | 0.26 | 0.24 | 0.24 | 0.23 | 0.22 | 0.22 | 0.20 | 0.22 | 0.10 | 0.00 |      |      |      |      |      |  |
| 37 | <i>Cyrtodactylus sanpelensis</i>          | 0.25 | 0.24 | 0.23 | 0.20 | 0.24 | 0.21 | 0.24 | 0.22 | 0.22 | 0.22 | 0.21 | 0.22 | 0.19 | 0.21 | 0.10 | 0.06 | 0.00 |      |      |      |      |  |
| 38 | <i>Cyrtodactylus linnwayensis</i>         | 0.28 | 0.28 | 0.27 | 0.25 | 0.32 | 0.28 | 0.28 | 0.28 | 0.29 | 0.30 | 0.27 | 0.25 | 0.24 | 0.25 | 0.25 | 0.24 | 0.25 | 0.00 |      |      |      |  |
| 39 | <i>Cyrtodactylus shwetaungorum</i>        | 0.29 | 0.28 | 0.29 | 0.24 | 0.31 | 0.27 | 0.29 | 0.29 | 0.29 | 0.29 | 0.28 | 0.26 | 0.24 | 0.26 | 0.25 | 0.25 | 0.25 | 0.06 | 0.00 |      |      |  |
| 40 | <i>Cyrtodactylus elok</i>                 | 0.36 | 0.33 | 0.34 | 0.29 | 0.36 | 0.32 | 0.33 | 0.32 | 0.33 | 0.33 | 0.32 | 0.34 | 0.33 | 0.34 | 0.33 | 0.30 | 0.32 | 0.31 | 0.32 | -    |      |  |
| 41 | <i>Cyrtodactylus interdigitalis</i>       | 0.34 | 0.32 | 0.33 | 0.30 | 0.36 | 0.31 | 0.33 | 0.32 | 0.33 | 0.34 | 0.32 | 0.35 | 0.34 | 0.34 | 0.32 | 0.30 | 0.31 | 0.32 | 0.33 | 0.23 | 0.02 |  |
