# Supplementary material for: Phylogenetic analyses of distantly related clades of bent-toed geckos (genus Cyrtodactylus) reveal an unprecedented amount of cryptic diversity in northern and western Thailand
Source: PubMed Central journal article supplement (PMC7840752; doi:10.1038/s41598-020-70640-8), 2021-01-27
Supplement: 41598_2020_70640_MOESM2_ESM.pdf [file 41598_2020_70640_MOESM2_ESM.pdf]

Supplementary information  
Table S2

**Phylogenetic analyses of distantly related clades of bent-toed geckos (genus *Cyrtodactylus*) reveal an unprecedented amount of cryptic diversity in northern and western Thailand**

Siriwadee Chomdej<sup>1,2\*</sup>, Waranee Pradit<sup>1</sup>, Chatmongkon Suwannapoom<sup>3</sup>, Parinya Pawangkhanant<sup>3</sup>, Korakot Nganvongpanit<sup>4,5</sup>, Nikolay A. Poyarkov<sup>6,7</sup>, Jing Che<sup>8,9</sup>, Yangchun Gao<sup>10</sup>, Shiping Gong<sup>10\*</sup>

**Table S2** List of specimens used for phylogenetic analysis. N/A: not available.

| Species                             | Localities                                                                                                      | Vouchers    | Accession Numbers | References                        |
|-------------------------------------|-----------------------------------------------------------------------------------------------------------------|-------------|-------------------|-----------------------------------|
| <i>Cyrtodactylus aequalis</i>       | Kyaiktiyo Hill, Mon State, Myanmar                                                                              | LSUHC 12895 | MF872275          | Grismer, et al. <sup>19</sup>     |
| <i>Cyrtodactylus aequalis</i>       | Kyaiktiyo Hill, Mon State, Myanmar                                                                              | LSUHC 14055 | MN534918          | Grismer, et al. <sup>37</sup>     |
| <i>Cyrtodactylus auribalteatus</i>  | N/A                                                                                                             | N/A         | AP018116          | Areesirisuk, et al. <sup>54</sup> |
| <i>Cyrtodactylus brevipalmatus</i>  | Khao Ramrome, Ron Phibun District, Nakhon Si Thammarat, Thailand                                                | AUP-00573   | MT468899          | This study                        |
| <i>Cyrtodactylus dammathetensis</i> | Dammathet Cave 19.8 km east of Mawlamyine, Mawlamyine District, Mon State, Myanmar                              | LSUHC 12862 | MF872276          | Grismer, et al. <sup>19</sup>     |
| <i>Cyrtodactylus dammathetensis</i> | Dammathet Cave 19.8 km east of Mawlamyine, Mawlamyine District, Mon State, Myanmar                              | LSUHC 12864 | MF872278          | Grismer, et al. <sup>19</sup>     |
| <i>Cyrtodactylus doisuthep</i>      | Doi Suthep, Mueang District, Chiang Mai Province, Thailand                                                      | AUP-00777   | MT497801          | This study                        |
| <i>Cyrtodactylus dumnuui</i>        | cave near Doi Phrabart (formerly Tham (Cave) Phabartmaejon), Chiang Dao District, Chiang Mai Province, Thailand | AUP-00769   | MT497802          | This study                        |
| <i>Cyrtodactylus dumnuui</i>        | Doi Phrabart abbey (formerly Tham (Cave) Phabartmaejon), Chiang Dao District, Chiang Mai Province, Thailand     | AUP-00770   | MT497803          | This study                        |
| <i>Cyrtodactylus elok</i>           | the Gap, Fraser's Hill, Pahang, West Malaysia                                                                   | LSUHC 6471  | JQ889180          | Johnson, et al. <sup>55</sup>     |
| <i>Cyrtodactylus erythropros</i>    | Coral Cave, Pang Mapha District, Mae Hong Son Province, Thailand                                                | AUP-00771   | MT497806          | This study                        |
| <i>Cyrtodactylus interdigitalis</i> | Nakai District, Khammouan Province, Laos                                                                        | FMNH 255454 | JQ889181          | Johnson, et al. <sup>55</sup>     |
| <i>Cyrtodactylus inthanon</i>       | Tiger Head mountain, Doi Inthanon National Park, Chom Thong District, Chiang Mai Province, Thailand             | AUP-00156   | MT497800          | This study                        |
| <i>Cyrtodactylus lenya</i>          | the proposed Lenya National Park Extension, Tanintharyi Region, Myanmar                                         | USNM 587788 | KY041653          | Connette, et al. <sup>56</sup>    |
| <i>Cyrtodactylus lenya</i>          | the proposed Lenya National Park Extension, Tanintharyi Region, Myanmar                                         | USNM 587789 | KY041652          | Connette, et al. <sup>56</sup>    |
| <i>Cyrtodactylus lenya</i>          | the proposed Lenya National Park Extension, Tanintharyi Region, Myanmar                                         | CAS 260233  | KY041655          | Connette, et al. <sup>56</sup>    |
| <i>Cyrtodactylus linnoensis</i>     | Linno Cave region 5 km south-west of Hpa-an, Hpa-an District, Kayin State, Myanmar                              | BYU 52230   | MF872290          | Grismer, et al. <sup>19</sup>     |

**Table S2 (Continued)** List of specimens used for phylogenetic analysis. N/A: not available.

| Species                             | Localities                                                                                                  | Vouchers    | Accession Numbers | References          |
|-------------------------------------|-------------------------------------------------------------------------------------------------------------|-------------|-------------------|---------------------|
| <i>Cyrtodactylus linnoensis</i>     | Linno Cave region 5 km south-west of Hpa-an, Hpa-an District, Kayin State, Myanmar                          | LSUHC 12829 | MF872297          | Grismer, et al. 19  |
| <i>Cyrtodactylus linnwayensis</i>   | Yum Twing Gyi Cave, Linn-Way Village, 12.7 km north-east of Ywangan, Taunggyi District, Shan State, Myanmar | BYU 52214   | MF872280          | Grismer, et al. 19  |
| <i>Cyrtodactylus linnwayensis</i>   | Yum Twing Gyi Cave, Linn-Way Village, 12.7 km north-east of Ywangan, Taunggyi District, Shan State, Myanmar | LSUHC 12983 | MF872287          | Grismer, et al. 19  |
| <i>Cyrtodactylus oldhami</i>        | captive                                                                                                     | JB 126      | JX440548          | Wood, et al. 18     |
| <i>Cyrtodactylus oldhami</i>        | Kraburi District, Phang-Nga Province, Thailand                                                              | MS 460      | MF872301          | Grismer, et al. 19  |
| <i>Cyrtodactylus oldhami</i>        | Muang District, Ranong Province, Thailand                                                                   | MS 585      | MF872302          | Grismer, et al. 19  |
| <i>Cyrtodactylus payarhtanensis</i> | the proposed Lenya National Park, Tanintharyi Region, Myanmar                                               | USNM 587791 | KY041658          | Connette, et al. 56 |
| <i>Cyrtodactylus payarhtanensis</i> | the proposed Lenya National Park, Tanintharyi Region, Myanmar                                               | USNM 587408 | KY041654          | Connette, et al. 56 |
| <i>Cyrtodactylus pharbaungensis</i> | Pharpoun Cave 38.4 km south-east of Mawlamyine, Mawlamyine District, Mon State, Myanmar                     | BYU 52215   | MF872303          | Grismer, et al. 19  |
| <i>Cyrtodactylus pharbaungensis</i> | Pharpoun Cave 38.4 km south-east of Mawlamyine, Mawlamyine District, Mon State, Myanmar                     | LSUHC 12870 | MF872304          | Grismer, et al. 19  |
| <i>Cyrtodactylus sadanensis</i>     | Sadan Cave 17 km south-east of Hpa-an, Hpa-an District, Kayin State, Myanmar                                | BYU 52216   | MF872310          | Grismer, et al. 19  |
| <i>Cyrtodactylus sadanensis</i>     | Sadan Cave 17 km south-east of Hpa-an, Hpa-an District, Kayin State, Myanmar                                | LSUHC 12848 | MF872322          | Grismer, et al. 19  |
| <i>Cyrtodactylus sadansinensis</i>  | Sadan Sin Cave 10.5 km north-west of Mawlamyine, Mawlamyine District, Mon State, Myanmar                    | BYU 52220   | MF872325          | Grismer, et al. 19  |
| <i>Cyrtodactylus sadansinensis</i>  | Sadan Sin Cave 10.5 km north-west of Mawlamyine, Mawlamyine District, Mon State, Myanmar                    | LSUHC 12859 | MF872330          | Grismer, et al. 19  |
| <i>Cyrtodactylus sai yok</i>        | Suan Phueng District, Ratchaburi Province, Thailand                                                         | AUP-00668   | MT468900          | This study          |

**Table S2 (Continued)** List of specimens used for phylogenetic analysis. N/A: not available.

| Species                            | Localities                                                                                                    | Vouchers    | Accession Numbers | References            |
|------------------------------------|---------------------------------------------------------------------------------------------------------------|-------------|-------------------|-----------------------|
| <i>Cyrtodactylus saiyok</i>        | Sai Yok District, Kanchanaburi Province, Thailand                                                             | AUP-00773   | MT497805          | This study            |
| <i>Cyrtodactylus saiyok</i>        | Sai Yok National Park, Kanchanaburi Province, Thailand                                                        | MS 484      | MF872308          | Grismer, et al.<br>19 |
| <i>Cyrtodactylus saiyok</i>        | Suang Phung, Ratchaburi Province, Thailand                                                                    | MS 480      | MF872309          | Grismer, et al.<br>19 |
| <i>Cyrtodactylus sanook</i>        | Tham Sanook, Muang District, Chumphon Province, Thailand                                                      | AUP-00570   | MT468898          | This study            |
| <i>Cyrtodactylus sanpelensis</i>   | Sanpel Cave 21.3 km south-east of Mawlamyine, Mawlamyine District, Mon State, Myanmar                         | BYU 52224   | MF872334          | Grismer, et al.<br>19 |
| <i>Cyrtodactylus sanpelensis</i>   | Sanpel Cave 21.3 km south-east of Mawlamyine, Mawlamyine District, Mon State, Myanmar (N16°22.427,E97°46.388) | LSUHC 12877 | MF872337          | Grismer, et al.<br>19 |
| <i>Cyrtodactylus shwetaungorum</i> | 5.3 km north of Pyinyaung Village at the Apache Cement factory mining site, Mandalay Region                   | BYU 52227   | MF872348          | Grismer, et al.<br>19 |
| <i>Cyrtodactylus shwetaungorum</i> | 5.3 km north of Pyinyaung Village at the Apache Cement factory mining site, Mandalay Region                   | LSUHC 12898 | MF872353          | Grismer, et al.<br>19 |
| <i>Cyrtodactylus sinyineensis</i>  | Sin Yine Cave 18.5 km south-east of Hpa-an, Hpa-an District, Kayin State, Myanmar                             | LSUHC 12835 | MF872354          | Grismer, et al.<br>19 |
| <i>Cyrtodactylus sinyineensis</i>  | Sin Yine Cave 18.5 km south-east of Hpa-an, Hpa-an District, Kayin State, Myanmar                             | LSUHC 12836 | MF872355          | Grismer, et al.<br>19 |
| <i>Cyrtodactylus sinyineensis</i>  | Sin Yine Cave 18.5 km south-east of Hpa-an, Hpa-an District, Kayin State, Myanmar                             | LSUHC 12837 | MF872356          | Grismer, et al.<br>19 |
| <i>Cyrtodactylus</i> sp.           | Phu Rua District, Loei Province, Thailand                                                                     | FMNH 265806 | JX519471          | Grismer, et al.<br>14 |
| <i>Cyrtodactylus</i> sp. 1         | Chao Doi Waterfall, Mae Moei National Park, Tha Song Yang District, Tak Province, Thailand                    | AUP-00683   | MT468903          | This study            |

**Table S2 (Continued)** List of specimens used for phylogenetic analysis. N/A: not available.

| <b>Species</b>                   | <b>Localities</b>                                                                                               | <b>Vouchers</b>           | <b>Accession Numbers</b> | <b>References</b>  |
|----------------------------------|-----------------------------------------------------------------------------------------------------------------|---------------------------|--------------------------|--------------------|
| <i>Cyrtodactylus</i> sp. 1       | Chao Doi Waterfall, Mae Moei National Park, Tha Song Yang District, Tak Province, Thailand                      | AUP-00684                 | MT468904                 | This study         |
| <i>Cyrtodactylus</i> sp. 1       | Mae Moei National Park, Tha Song Yang District, Tak Province, Thailand                                          | AUP-00685                 | MT468905                 | This study         |
| <i>Cyrtodactylus</i> sp. 1       | Mae Moei National Park, Tha Song Yang District, Tak Province, Thailand                                          | AUP-00687                 | MT468906                 | This study         |
| <i>Cyrtodactylus</i> sp. 2       | Mae Usu Cave, Mae Moei National Park, Tha Song Yang District, Tak Province, Thailand                            | AUP-00673                 | MT468901                 | This study         |
| <i>Cyrtodactylus</i> sp. 3       | Sri Fah Cave, Mae Sot District, Tak Province, Thailand                                                          | AUP-00692                 | MT468912                 | This study         |
| <i>Cyrtodactylus</i> sp. 4       | Mae Wong National Park, Khlong Lan District, Kamphaeng Phet Province, Thailand                                  | AUP-00775                 | MT497807                 | This study         |
| <i>Cyrtodactylus</i> sp. 5       | Mae Klang Luang, Doi Inthanon National Park, Chom Thong District, Chiang Mai Province, Thailand                 | AUP-01027                 | MT468907                 | This study         |
| <i>Cyrtodactylus</i> sp. 6       | Mae Hong Son Bamboo Complex, Mueang District, Mae Hong Son Province, Thailand                                   | AUP-01576                 | MT468908                 | This study         |
| <i>Cyrtodactylus</i> sp. 7       | Thong Pha Phum National Park, Thong Pha Phum District, Kanchanaburi Province, Thailand                          | AUP-01718                 | MT468910                 | This study         |
| <i>Cyrtodactylus</i> sp. 8       | Near Vajiralongkorn dam, Thong Pha Phum National Park, Thong Pha Phum District, Kanchanaburi Province, Thailand | AUP-01722                 | MT468911                 | This study         |
| <i>Cyrtodactylus</i> sp. 9       | Thong Pha Phum National Park, Thong Pha Phum District, Kanchanaburi Province, Thailand                          | AUP-01715                 | MT468909                 | This study         |
| <i>Cyrtodactylus</i> sp. 10      | Chao Doi Waterfall, Mae Moei National Park, Tha Song Yang District, Tak Province, Thailand                      | AUP-00680                 | MT468902                 | This study         |
| <i>Cyrtodactylus thirakhupti</i> | Tham Khao Sonk Hill, Surat Thani Province, Thailand                                                             | ZMKU_R_00732, LSUHC 12467 | MF872357                 | Grismer, et al. 19 |
| <i>Cyrtodactylus thirakhupti</i> | Tham Khao Sonk Hill, Surat Thani Province, Thailand                                                             | ZMKU_R_00733, LSUHC 12468 | MF872358                 | Grismer, et al. 19 |

**Table S2** (Continued) List of specimens used for phylogenetic analysis. N/A: not available.

| <b>Species</b>                      | <b>Localities</b>                                                                      | <b>Vouchers</b> | <b>Accession Numbers</b> | <b>References</b>                 |
|-------------------------------------|----------------------------------------------------------------------------------------|-----------------|--------------------------|-----------------------------------|
| <i>Cyrtodactylus thirakhupti</i>    | N/A                                                                                    | N/A             | AP018115                 | Areesirisuk, et al. <sup>54</sup> |
| <i>Cyrtodactylus tigroides</i>      | Wang Krachae Subdistrict, Sai Yok District, Kanchanaburi Province, Thailand            | AUP-00776       | MT497804                 | This study                        |
| <i>Cyrtodactylus tigroides</i>      | Ban Tha Sao, Sai Yok District, Kanchanaburi Province, Thailand                         | IRSNB 2380      | JX440562                 | Wood, et al. <sup>18</sup>        |
| <i>Cyrtodactylus tigroides</i>      | N/A                                                                                    | N/A             | AP018118                 | Areesirisuk, et al. <sup>54</sup> |
| <i>Cyrtodactylus welpyanensis</i>   | Wel Pyan Cave 35 km north of Hpa-an, Hpa-an District, Kayin State, Myanmar             | LSUHC 12785     | MF872360                 | Grismer, et al. <sup>19</sup>     |
| <i>Cyrtodactylus welpyanensis</i>   | Wel Pyan Cave 35 km north of Hpa-an, Hpa-an District, Kayin State, Myanmar             | LSUHC 12792     | MF872362                 | Grismer, et al. <sup>19</sup>     |
| <i>Cyrtodactylus yathepyanensis</i> | Yathe Pyan Cave 9 km south-west of Hpa-an, Hpa-an District, Kayin State, Myanmar       | BYU 52229       | MF872364                 | Grismer, et al. <sup>19</sup>     |
| <i>Cyrtodactylus yathepyanensis</i> | Yathe Pyan Cave 9 km south-west of Hpa-an, Hpa-an District, Kayin State, Myanmar       | LSUHC 12823     | MF872367                 | Grismer, et al. <sup>19</sup>     |
| <b>Outgroup</b>                     |                                                                                        |                 |                          |                                   |
| <i>Gekko gecko</i>                  | Shwesettaw wildlife sanctuary, Mimbun Township, Magway Division, Myanmar               | CAS 213628      | JN019053                 | Rösler, et al. <sup>57</sup>      |
| <i>Ptychozoon kaengkrachanense</i>  | Thong Pha Phum National Park, Thong Pha Phum District, Kanchanaburi Province, Thailand | AUP-01710       | MT468895                 | This study                        |
| <i>Dixonius siamensis</i>           | Thong Pha Phum National Park, Thong Pha Phum District, Kanchanaburi Province, Thailand | AUP-01724       | MT468896                 | This study                        |
| <i>Hemidactylus frenatus</i>        | Ratnegala, Sri Lanka                                                                   | AMB 7420        | EU268359                 | Bauer, et al. <sup>58</sup>       |
